# Supplementary material for: Klebsiella pneumoniae type VI secretion system-mediated microbial competition is PhoPQ controlled and reactive oxygen species dependent
Source: PubMed Central journal article supplement (PMC7108748; doi:10.1371/journal.ppat.1007969), 2020-03-19
Supplement: ppat.1007969.s003.pdf [file ppat.1007969.s003.pdf]

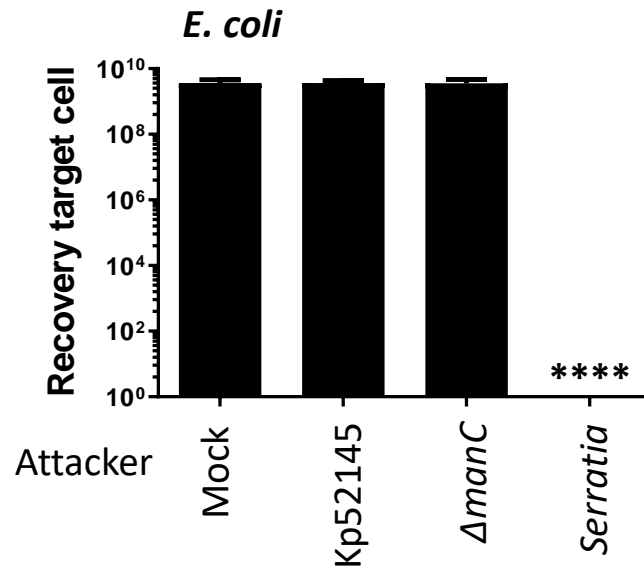

**S2 Figure. Lack of bacterial killing when *K. pneumoniae* 52.145 grows in LB.**

Recovery of *E. coli* target cell following 6 h incubation with Kp52145, 52145- $\Delta manC$  ( $\Delta manC$ ), and *S. marcescens* Db10 (*Serratia*). The data are presented as means  $\pm$  the standard deviations (n = 3).\*\*\*\*, results are significantly different (P < 0.0001 [two-tailed t test]) from the results for PBS-treated (mock) target cell.
