# Supplementary material for: Klebsiella pneumoniae type VI secretion system-mediated microbial competition is PhoPQ controlled and reactive oxygen species dependent
Source: PubMed Central journal article supplement (PMC7108748; doi:10.1371/journal.ppat.1007969), 2020-03-19
Supplement: ppat.1007969.s004.pdf [file ppat.1007969.s004.pdf]

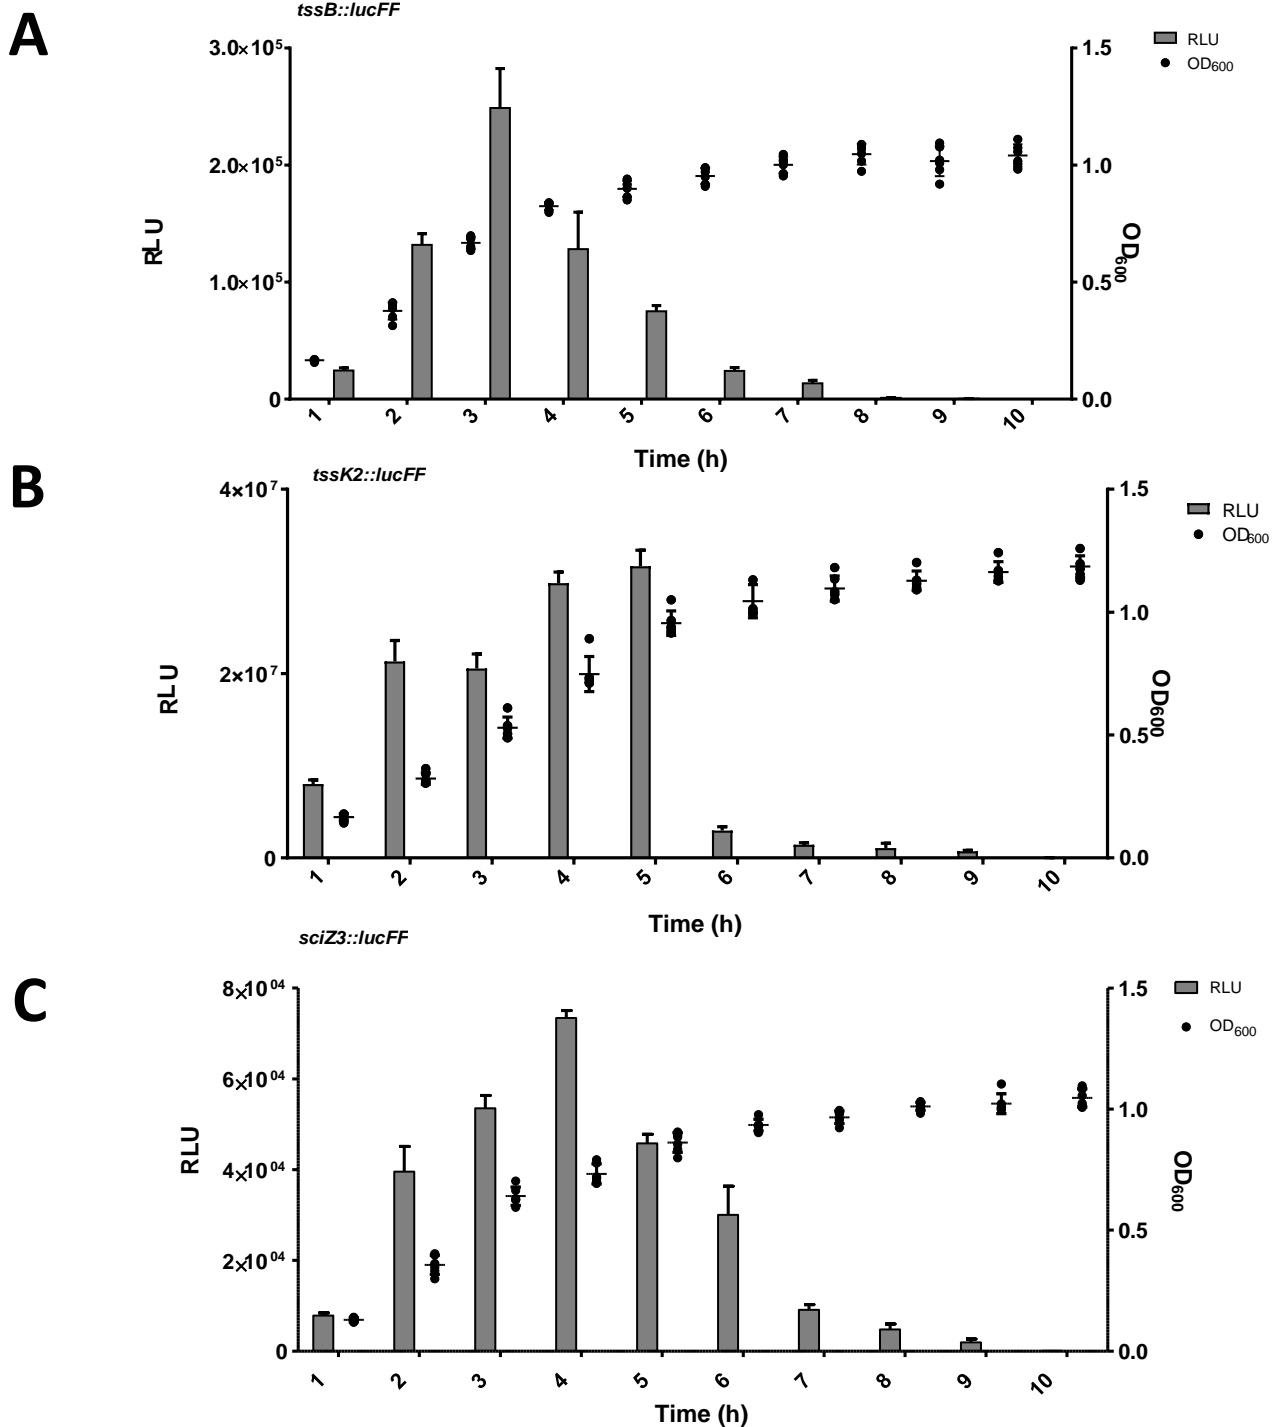

**S3 Figure. Effect of growth phase on *K. pneumoniae* 52.145 T6SS expression.**

(A, B, C) Analysis of the T6SS expression by Kp52145 carrying the transcriptional fusions *tssB::lucFF* to monitor locus I, *tssK2::lucFF* to monitor locus II, and *sciZ3::lucFF* to monitor locus III. At the indicated time points, an aliquot of the culture was taken to measure luciferase levels, and OD<sub>600</sub>. Luminescence is expressed as relative light units (RLU). The data are presented as means ± the standard deviations (n = 3)
