# Supplementary material for: Klebsiella pneumoniae type VI secretion system-mediated microbial competition is PhoPQ controlled and reactive oxygen species dependent
Source: PubMed Central journal article supplement (PMC7108748; doi:10.1371/journal.ppat.1007969), 2020-03-19
Supplement: ppat.1007969.s007.pdf [file ppat.1007969.s007.pdf]

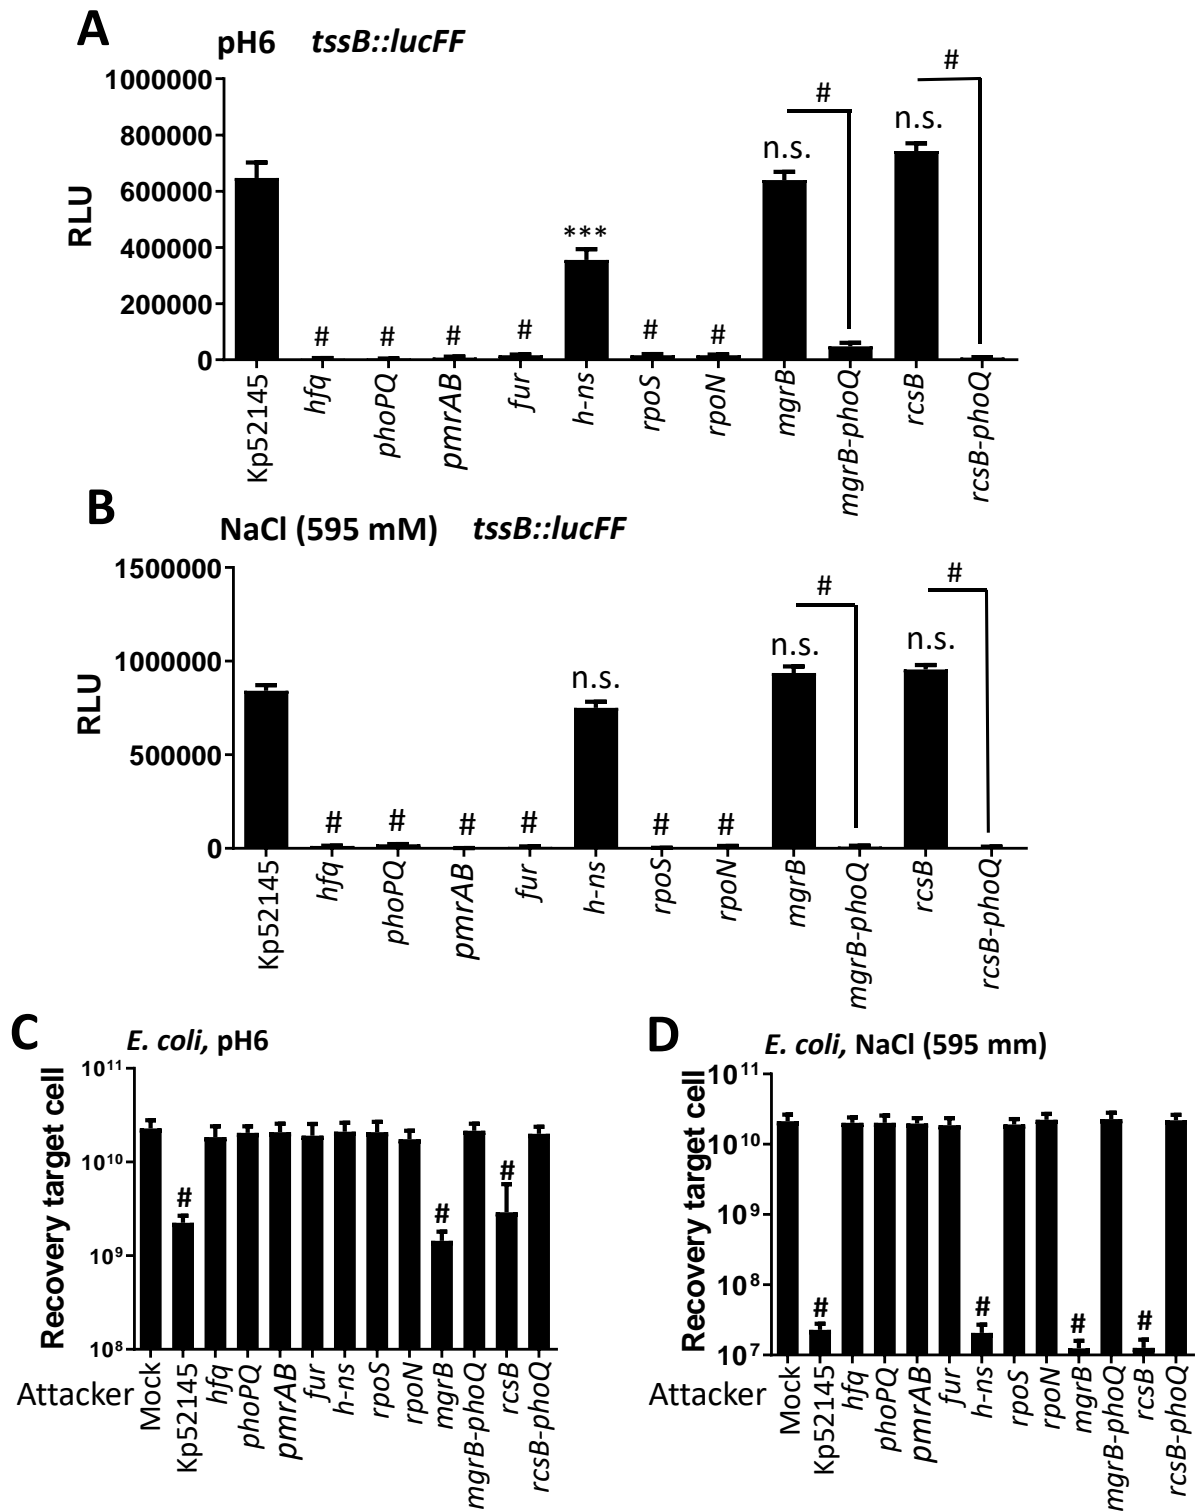

**S6 Figure. Identification of transcriptional factors controlling *K. pneumoniae* T6SS expression.**

(A, B) Analysis of the T6SS expression by *K. pneumoniae* CIP52.145 (Kp52145), 52145- $\Delta hfq$  (*hfq*), 52145- $\Delta phoPQGB$  (*phoPQ*), 52145- $\Delta pmrAB$  (*pmrAB*), 52145- $\Delta fur$  (*fur*), 52145- $\Delta hns$  (*h-ns*), 52145- $\Delta rpoS$  (*rpoS*), 52145- $\Delta rpoN$  (*rpoN*), 52145- $\Delta mgrB$  (*mgrB*), 52145- $\Delta mgrB\Delta phoPQGB$  (*mgrB-phoPQ*), 52145- $\Delta rcsB$  (*rcsB*), and 52145- $\Delta rcsB\Delta phoPQGB$  (*rcsB-phoPQ*) carrying the

transcriptional fusion *tssB::lucFF* and grown in LB<sub>pH6</sub> (pH6) and LB<sub>NaCl</sub> (NaCl 595 mM). The data are presented as means ± the standard deviations (n = 3). #, results are significantly different (P < 0.0001) from the results for Kp52145 and for the indicated comparison; \*\*\*, results are significantly different (P < 0.001) from the results for Kp52145; n.s. results are not significantly different (P>0.05 001) from the results for Kp52145; one-way ANOVA Bonferroni correction for multiple comparisons.

(C, D) Bacterial killing activity mediated by *K. pneumoniae* CIP52.145 (Kp52145), 52145- $\Delta$ *hfq* (*hfq*), 52145- $\Delta$ *phoPQGB* (*phoPQ*), 52145- $\Delta$ *pmrAB* (*pmrAB*), 52145- $\Delta$ *fur* (*fur*), 52145- $\Delta$ *hns* (*h-ns*), 52145- $\Delta$ *rpoS* (*rpoS*), 52145- $\Delta$ *rpoN* (*rpoN*), 52145- $\Delta$ *mgrB* (*mgrB*), 52145- $\Delta$ *mgrB*- $\Delta$ *phoPQGB* (*mgrB-phoPQ*), 52145- $\Delta$ *rcsB* (*rcsB*), and 52145- $\Delta$ *rcsB*- $\Delta$ *phoPQGB* (*rcsB-phoPQ*) against *E. coli* MG1655. Number of recovered target cells following 6 h incubation in LB<sub>pH6</sub> (pH6) and LB<sub>NaCl</sub> (NaCl 595 mM) is indicated. The data are presented as means ± the standard deviations (n = 3). #, results are significantly different (P < 0.0001) from the results for PBS-treated (mock) target cells; one-way ANOVA Bonferroni correction for multiple comparisons.
