# Supplementary material for: Klebsiella pneumoniae type VI secretion system-mediated microbial competition is PhoPQ controlled and reactive oxygen species dependent
Source: PubMed Central journal article supplement (PMC7108748; doi:10.1371/journal.ppat.1007969), 2020-03-19
Supplement: ppat.1007969.s009.pdf [file ppat.1007969.s009.pdf]

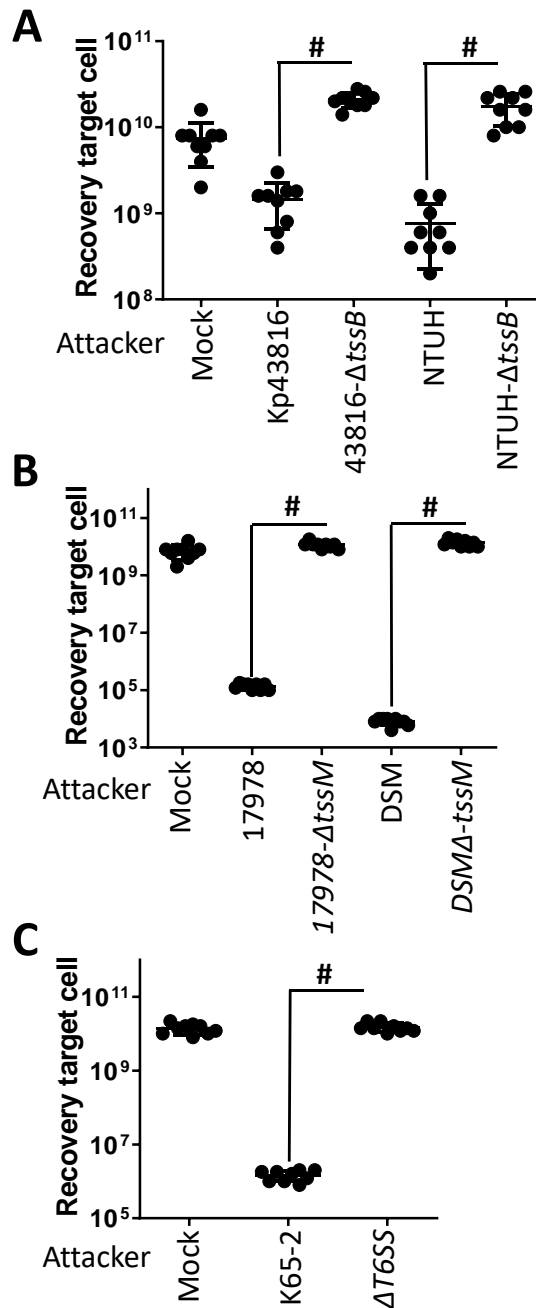

**S8 Figure. T6SS-dependent antagonism against *E. coli* prey.**

(A, B, C) T6SS-dependent anti-bacterial activity as determined by recovery of target organisms *E. coli* MG1655 following incubation with *K. pneumoniae* ATCC43816 (Kp43816), 43816- $\Delta$ tssB (43816- $\Delta$ tssB), *K. pneumoniae* NTUH-K2044 (NTUH), NTUH- $\Delta$ tssB (NTUH- $\Delta$ tssB), *A. baumannii* ATCC17978 (17978), 17978- $\Delta$ tssM (17978- $\Delta$ tssM), *A. baumannii* DSM30011 (DSM), *A. baumannii* DSM30011-  $\Delta$ tssM, (DSM30011-  $\Delta$ tssM), *B. cenocepacia* K56-2 (K56-2), and K56-2- $\Delta$ atsR $\Delta$ T6SS ( $\Delta$ T6SS) in LB. #, results are significantly different ( $P < 0.0001$  [one-way ANOVA Bonferroni for

multiple comparisons]) for the indicated comparisons. Mock, PBS-treated target cell. The data are presented as means  $\pm$  the standard deviations (n = 3).
