# Supplementary material for: Klebsiella pneumoniae type VI secretion system-mediated microbial competition is PhoPQ controlled and reactive oxygen species dependent
Source: PubMed Central journal article supplement (PMC7108748; doi:10.1371/journal.ppat.1007969), 2020-03-19
Supplement: ppat.1007969.s011.pdf [file ppat.1007969.s011.pdf]

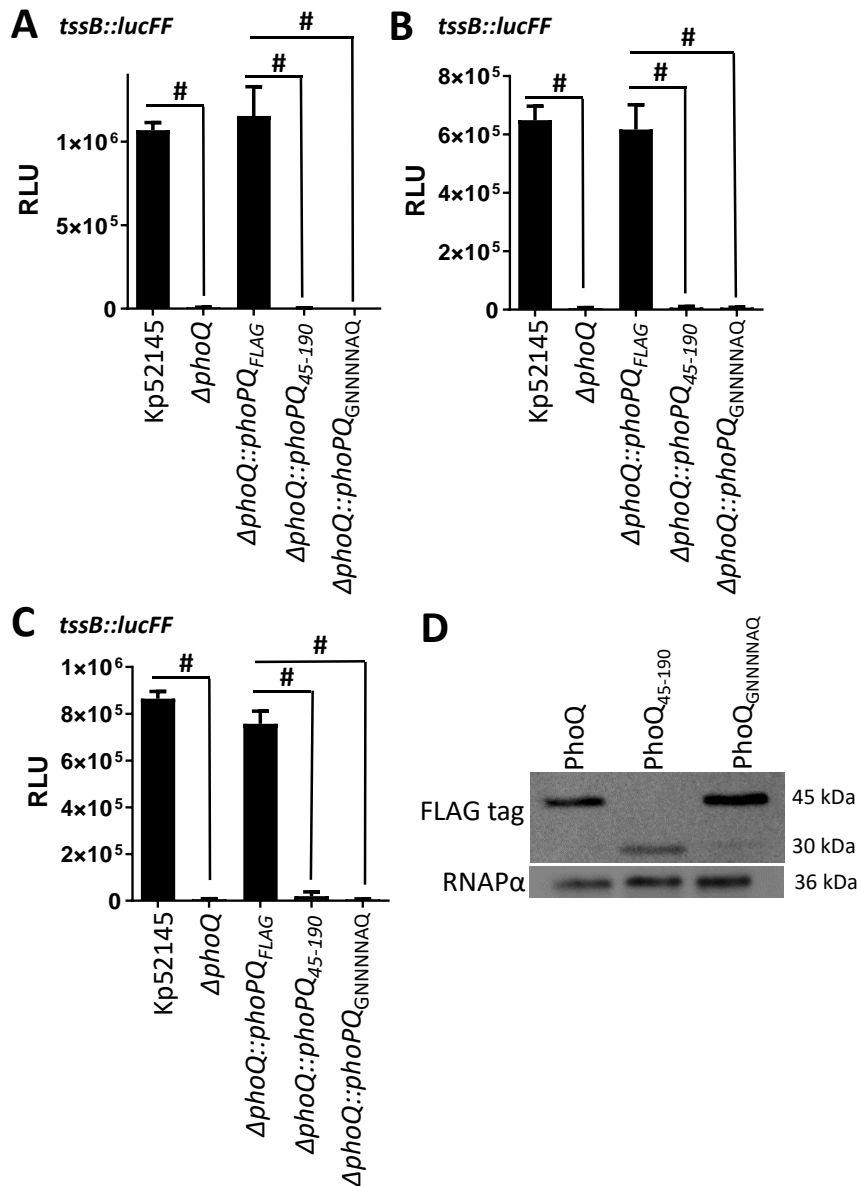

**S10 Figure. The periplasmic domain of PhoQ is needed for the regulation of the T6SS.**

(A, B, C) Expression of T6SS by Kp52145, 52145-Δ*phoPQGB* (Δ*phoPQ*), 52145-Δ*phoQGBComFLAG* (Δ*phoPQ*::*phoPQ*<sub>FLAG</sub>), 52145-Δ*phoQGBComPhoQ*<sub>45-190</sub> (Δ*phoPQ*::*phoPQ*<sub>45-190</sub>), and 52145-Δ*phoQGBComPhoQ*<sub>GNNNNAQ</sub> (Δ*phoPQ*::*phoPQ*<sub>GNNNNAQ</sub>) carrying the transcriptional fusion *tssB::lucFF* after incubation in LB, LB<sub>pH6</sub> (pH6), and LB<sub>NaCl</sub> (NaCl 595 mM). #, results are significantly different (P < 0.0001 [one-way ANOVA Bonferroni for multiple comparisons]) for the indicated comparisons.

(D) Western blot analysis using an anti-FLAG antibody demonstrating the presence of PhoQ in cell pellets of 52145-Δ*phoQGBComFLAG* (*phoQ*), 52145-Δ*phoQGBComPhoQ*<sub>45-190</sub> (*phoQ*<sub>45-190</sub>), and

52145- $\Delta$ phoQGBComPhoQ<sub>GNNNNAQ</sub> (*phoQ*<sub>GNNNNAQ</sub>). Membranes were reprobbed with antibody anti RNA Polymerase  $\alpha$ . Images are representative of three independent experiments.
