# Supplementary material for: Klebsiella pneumoniae type VI secretion system-mediated microbial competition is PhoPQ controlled and reactive oxygen species dependent
Source: PubMed Central journal article supplement (PMC7108748; doi:10.1371/journal.ppat.1007969), 2020-03-19
Supplement: ppat.1007969.s012.pdf [file ppat.1007969.s012.pdf]

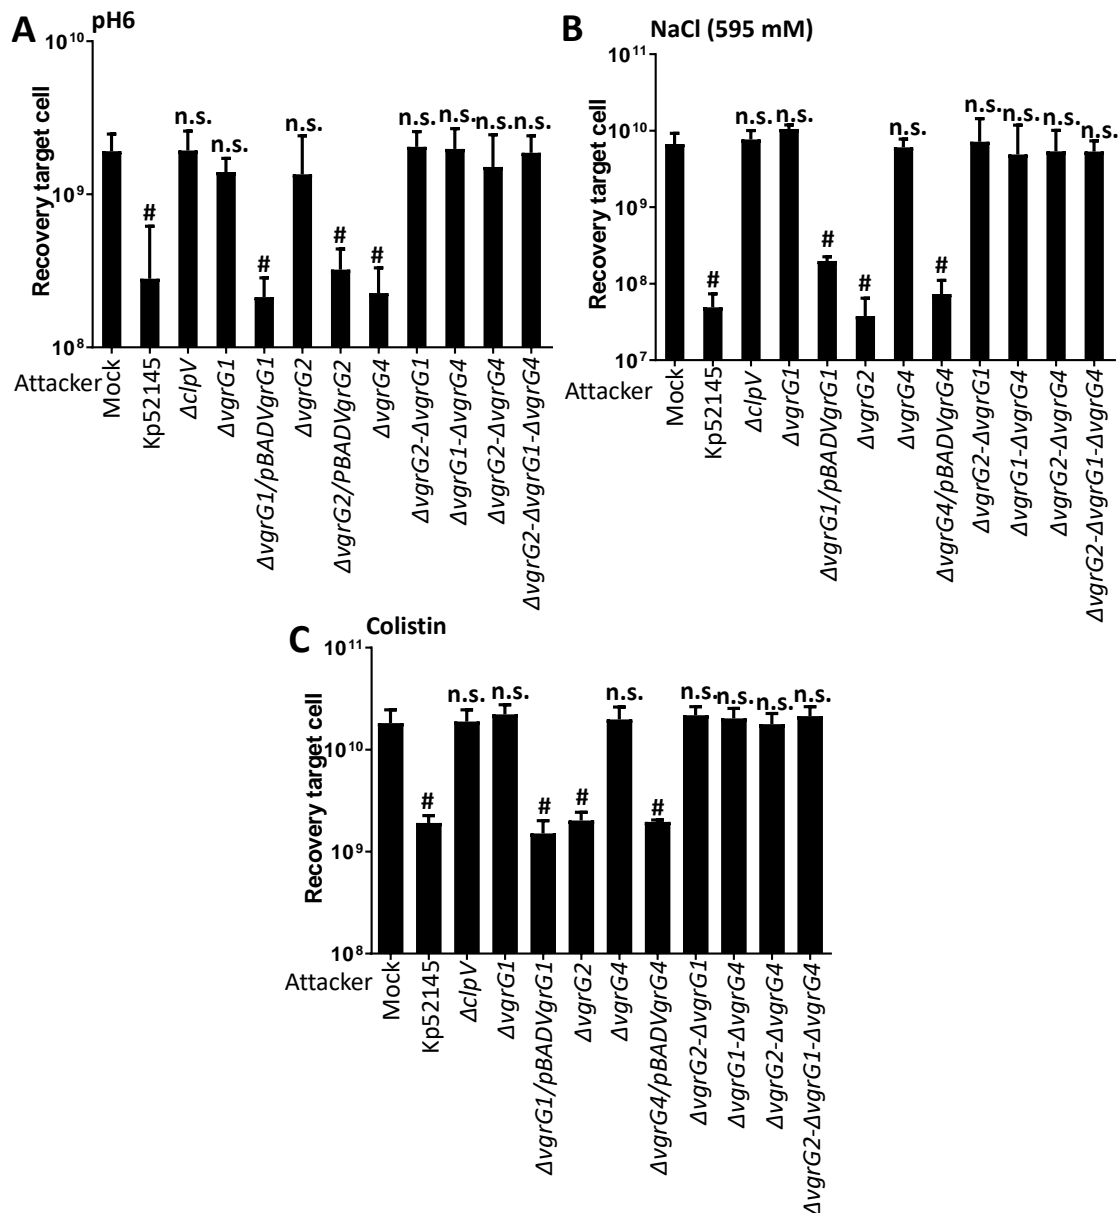

### S11 Figure. Role of *K. pneumoniae* T6SS VgrGs in bacterial competition.

(A, B, C) T6SS-dependent anti-bacterial activity as determined by recovery of target organism *E. coli* MG1655 following incubation with Kp52145, 52145-Δ*clpV* (Δ*clpV*), 52145-Δ*vgrG1* (Δ*vgrG1*), 52145-Δ*vgrG1* harbouring pBAD*VgrG1* (Δ*vgrG1*/ pBAD*VgrG1*), 52145-Δ*vgrG2* (Δ*vgrG2*), 52145-Δ*vgrG4* (Δ*vgrG4*), 52145-Δ*vgrG4* harbouring pBAD*VgrG4* (Δ*vgrG4*/pBAD*VgrG4*), 52145-Δ*vgrG2*-Δ*vgrG1* (Δ*vgrG2*-Δ*vgrG1*), 52145-Δ*vgrG1*-Δ*vgrG4* (Δ*vgrG1*-Δ*vgrG4*), 52145-Δ*vgrG2*-Δ*vgrG4* (Δ*vgrG2*-Δ*vgrG4*), 52145-Δ*vgrG2*-Δ*vgrG1*-Δ*vgrG4* (Δ*vgrG2*-Δ*vgrG1*-Δ*vgrG4*) in LB<sub>pH6</sub> (pH6), LB<sub>NaCl</sub> (NaCl 595 mM), and with sublethal concentration of colistin (0.1 μg/ml) in LB. In all panels, #, P < 0.0001; n.s. (P > 0.05), not significant differences from the results for PBS-treated (mock) target cell; one-way ANOVA Bonferroni for multiple comparisons. The data are presented as means ± the standard deviations (n = 3).
