# Supplementary material for: Klebsiella pneumoniae type VI secretion system-mediated microbial competition is PhoPQ controlled and reactive oxygen species dependent
Source: PubMed Central journal article supplement (PMC7108748; doi:10.1371/journal.ppat.1007969), 2020-03-19
Supplement: ppat.1007969.s014.pdf [file ppat.1007969.s014.pdf]

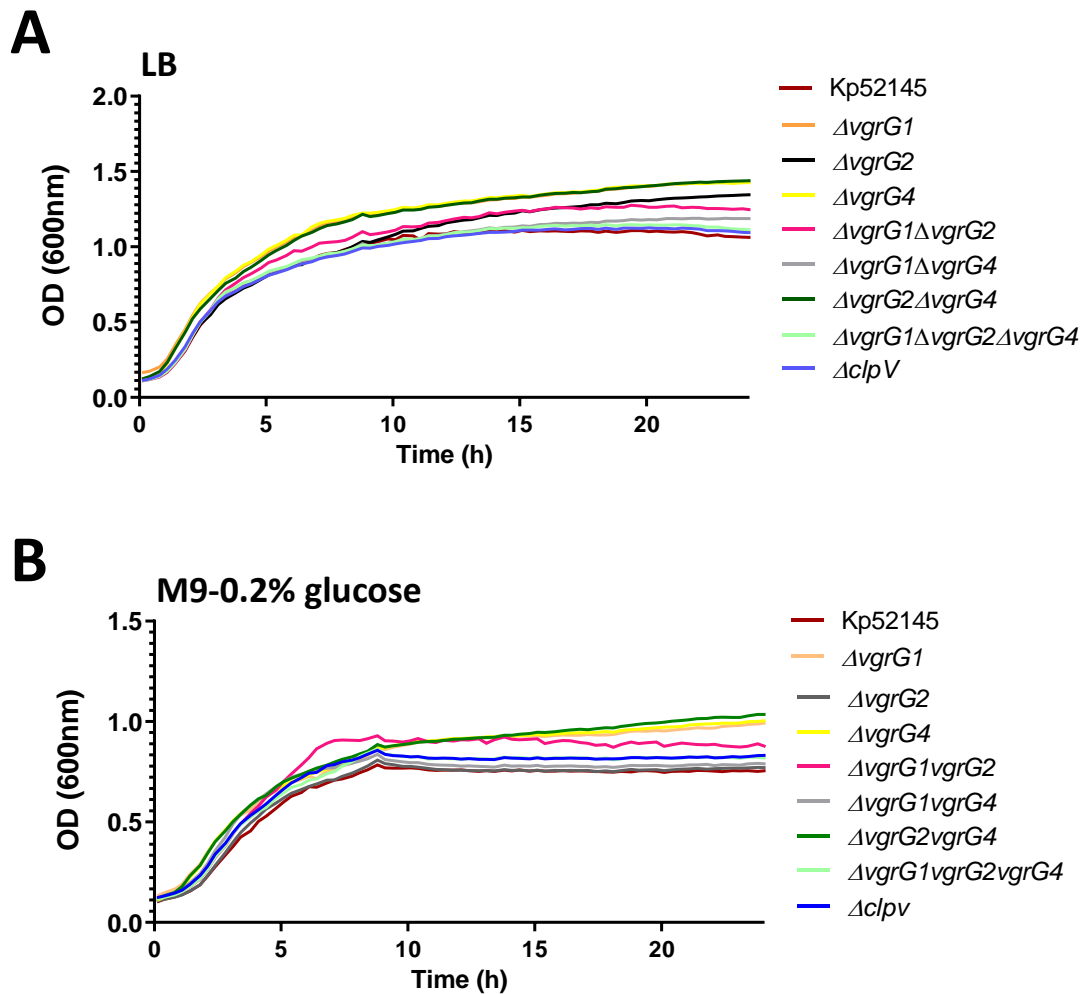

**S13 Figure. Growth kinetics of *K. pneumoniae* T6SS mutants.**

Growth kinetics of *K. pneumoniae* 51245 (Kp52145), 52145- $\Delta clpV$  ( $\Delta clpV$ ), 52145- $\Delta vgrG1$  ( $\Delta vgrG1$ ), 52145- $\Delta vgrG2$  ( $\Delta vgrG2$ ), 52145- $\Delta vgrG4$  ( $\Delta vgrG4$ ), 52145- $\Delta vgrG2\Delta vgrG1$  ( $\Delta vgrG2\Delta vgrG1$ ), 52145- $\Delta vgrG1\Delta vgrG4$  ( $\Delta vgrG1\Delta vgrG4$ ), 52145- $\Delta vgrG2\Delta vgrG4$  ( $\Delta vgrG2\Delta vgrG4$ ), 52145- $\Delta vgrG2\Delta vgrG1\Delta vgrG4$  ( $\Delta vgrG2\Delta vgrG1\Delta vgrG4$ ) in LB broth (LB) (A) and 2% glucose M9 minimal media supplemented with thiamine and MgSO<sub>4</sub> (M9-0.2% glucose) (B) over 24 h at 37°C. Values are presented as the mean  $\pm$  SD of three independent experiments measured in triplicate.
