# Supplementary material for: Klebsiella pneumoniae type VI secretion system-mediated microbial competition is PhoPQ controlled and reactive oxygen species dependent
Source: PubMed Central journal article supplement (PMC7108748; doi:10.1371/journal.ppat.1007969), 2020-03-19
Supplement: ppat.1007969.s018.pdf [file ppat.1007969.s018.pdf]

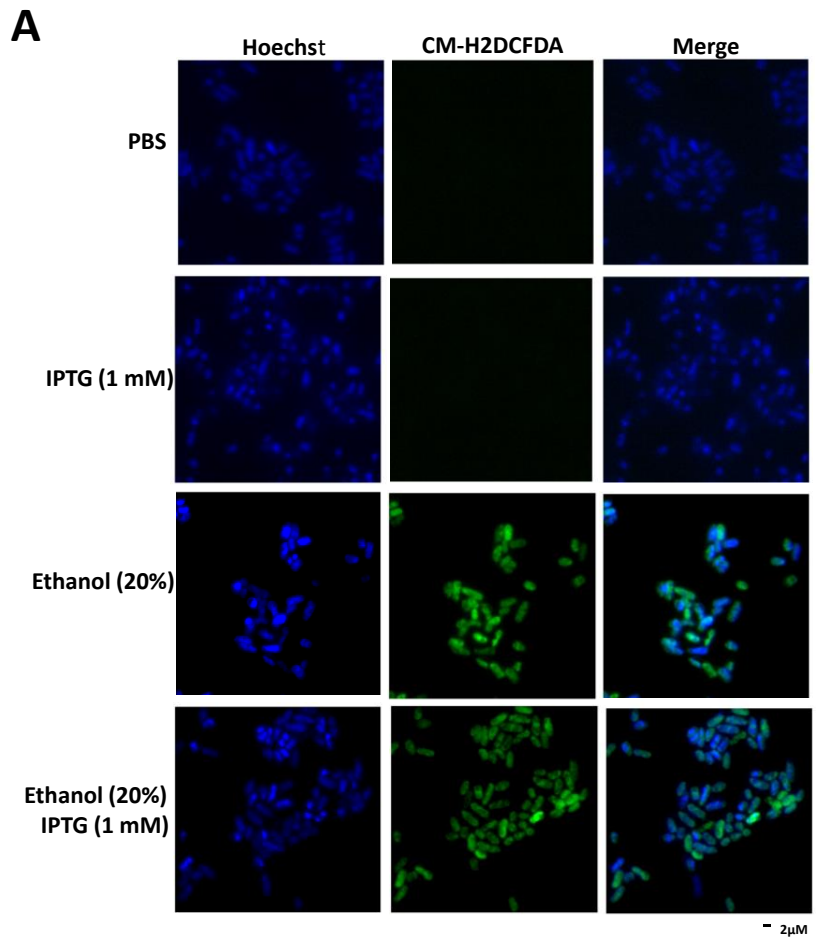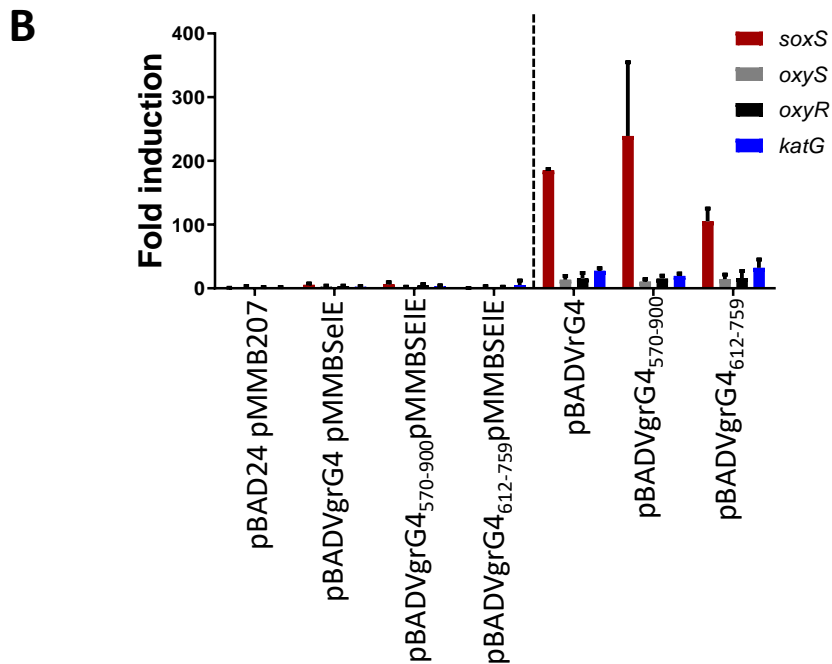

**S17 Figure. Sel1E abolishes VgrG4-induced ROS responses.**

(A) Sel1E is not a general ROS scavenger. Single-cell analysis of ROS using the general ROS fluorescence sensor CM-H2DCFDA in *E. coli* harbouring pMMBsel1E upon incubation with ethanol

(20%) following induction with IPTG for 60 min. Hoechst was used to stain bacterial DNA. Images are representative of three independent experiments.

(B) *soxS*, *oxyS*, *oxyR*, and *kat* levels assessed by RT-qPCR in *E. coli* harbouring the indicated plasmids following induction of the *Ara* promoter of the pBAD plasmid with arabinose (0.1%), and the *tac* promoter of the pMMB207 plasmid with IPTG (1 mM) for 60 min. The data are presented as means  $\pm$  the standard deviations (n = 3).
